# Supplementary material
Source: HighWire-hosted journal article supplement (https://www.cmajopen.ca/highwire/filestream/90754/field_highwire_adjunct_files/0/open-2022-0116-1-at.pdf)
Supplement: open-2022-0116-1-at.pdf [file open-2022-0116-1-at.pdf]

**Table S1.** Prevalence of VI among those with missing income data, stratified by diabetes status

| Survey Cycle(s) | With Diabetes | Without Diabetes |
|-----------------|---------------|------------------|
| 1994-1997       | 7.6%          | 2.2%             |
| 1998-2001       | 7.5%          | 1.6%             |
| 2008-2009       | 4.5%          | 2.1%             |
| 2009-2010       | 3.3%          | 1.2%             |
| 2013-2014       | 0%            | 0.4%             |

**Table S2.** Prevalence of VI stratified by age, education levels and diabetes status

| Year      | Age Groups | Low Levels of Education |                  | High Levels of Education |                  |
|-----------|------------|-------------------------|------------------|--------------------------|------------------|
|           |            | With Diabetes           | Without Diabetes | With Diabetes            | Without Diabetes |
| 1994-1997 | 45-64      | 5.53%                   | 2.78%            | 3.19%                    | 1.82%            |
|           | 65-74      | 10.12%                  | 4.00%            | 9.82%                    | 2.63%            |
|           | 75+        | 16.02%                  | 9.74%            | 4.79%                    | 10.57%           |
| 1998-2001 | 45-64      | 3.28%                   | 1.91%            | 5.49%                    | 17.09%           |
|           | 65-74      | 7.42%                   | 3.87%            | 6.29%                    | 3.11%            |
|           | 75+        | 10.36%                  | 8.21%            | 9.66%                    | 7.36%            |
| 2008-2009 | 45-64      | 1.55%                   | 1.15%            | 2.56%                    | 0.57%            |
|           | 65-74      | 1.86%                   | 2.01%            | 1.38%                    | 1.69%            |
|           | 75+        | 8.24%                   | 5.96%            | 6.76%                    | 5.70%            |
| 2009-2010 | 45-64      | 2.17%                   | 1.48%            | 1.42%                    | 0.89%            |
|           | 65-74      | 3.00%                   | 1.14%            | 1.71%                    | 1.46%            |
|           | 75+        | 7.04%                   | 5.11%            | 4.22%                    | 4.33%            |
| 2013-2014 | 45-64      | 1.91%                   | 1.40%            | 2.16%                    | 0.88%            |
|           | 65-74      | 2.46%                   | 1.54%            | 2.58%                    | 1.18%            |
|           | 75+        | 6.68%                   | 5.54%            | 5.58%                    | 3.96%            |

**Table S3.** Prevalence of VI stratified by age, income levels and diabetes status

| Year      | Age Groups | Low Levels of Income |                  | High Levels of Income |                  |
|-----------|------------|----------------------|------------------|-----------------------|------------------|
|           |            | With Diabetes        | Without Diabetes | With Diabetes         | Without Diabetes |
| 1994-1995 | 45-64      | 7.74%                | 3.61%            | 3.16%                 | 2.26%            |
|           | 65-74      | 10.84%               | 4.40%            | 14.80%                | 3.51%            |
|           | 75+        | 18.97%               | 12.60%           | 5.76%                 | 10.01%           |
| 1996-1997 | 45-64      | 4.16%                | 2.92%            | 3.04%                 | 1.63%            |
|           | 65-74      | 5.28%                | 2.62%            | 10.64%                | 3.80%            |
|           | 75+        | 13.07%               | 9.57%            | 15.89%                | 5.30%            |
| 1998-2001 | 45-64      | 4.28%                | 1.85%            | 4.66%                 | 1.82%            |
|           | 65-74      | 7.47%                | 3.63%            | 2.19%                 | 4.13%            |
|           | 75+        | 10.27%               | 8.09%            | 10.31%                | 7.32%            |
| 2008-2009 | 45-64      | 3.20%                | 1.59%            | 3.11%                 | 5.76%            |
|           | 65-74      | 1.60%                | 1.76%            | 1.01%                 | 1.46%            |
|           | 75+        | 7.44%                | 6.38%            | 7.60%                 | 4.80%            |
| 2009-2010 | 45-64      | 2.49%                | 1.91%            | 1.21%                 | 8.16%            |
|           | 65-74      | 3.37%                | 1.70%            | 1.15%                 | 1.02%            |
|           | 75+        | 7.48%                | 4.57%            | 5.35%                 | 4.86%            |
| 2013-2014 | 45-64      | 4.98%                | 2.04%            | 0.82%                 | 0.79%            |
|           | 65-74      | 3.06%                | 1.99%            | 2.00%                 | 0.90%            |
|           | 75+        | 5.85%                | 5.33%            | 6.70%                 | 4.42%            |
